# Supplementary material for: Pharmacogenomic Analysis Reveals CCNA2 as a Predictive Biomarker of Sensitivity to Polo-Like Kinase I Inhibitor in Gastric Cancer
Source: MDPI journal article supplement (doi:10.3390/cancers12061418), 2020-05-30
Supplement: s1 [file s1]

**Fig. 2a**

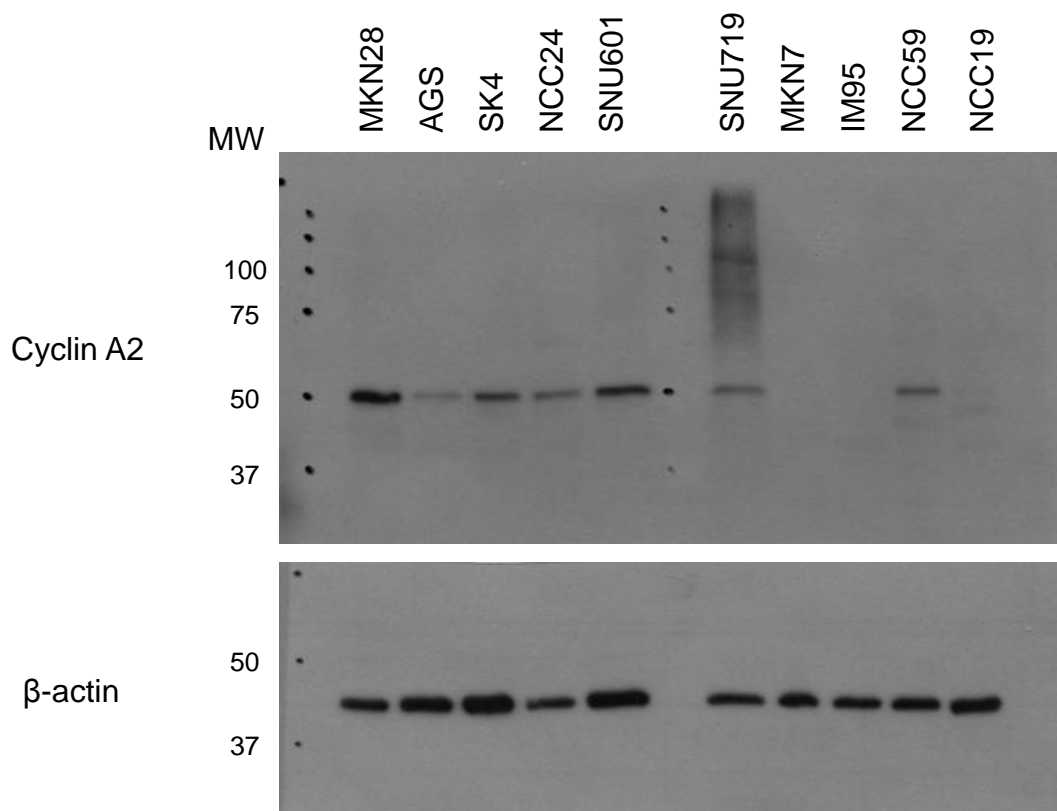

Band quantification was performed using ImageJ software

| Figure 2 (a) | Normalized intensity<br>(/ $\beta$ -actin) | Fold change |
|--------------|--------------------------------------------|-------------|
|              | Cyclin A2                                  |             |
| MKN28        | 1.03                                       | 1.00        |
| AGS          | 0.15                                       | 0.14        |
| SK4          | 0.31                                       | 0.31        |
| NCC24        | 0.46                                       | 0.45        |
| SNU601       | 0.40                                       | 0.39        |
| SNU719       | 0.44                                       | 0.42        |
| MKN7         | 0.04                                       | 0.04        |
| IM95         | 0.11                                       | 0.11        |
| NCC59        | 0.36                                       | 0.35        |
| NCC19        | 0.10                                       | 0.10        |

**Fig. 2c**

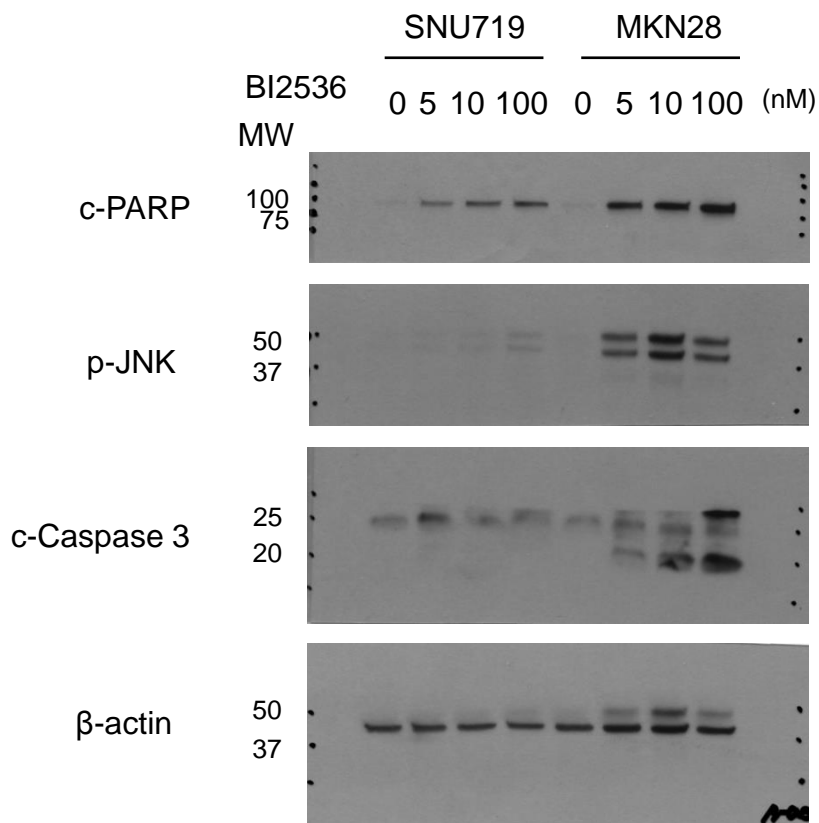

| Figure 2 (c) | Normalized intensity<br>(/ $\beta$ -actin) |       |                | Fold change |       |                |
|--------------|--------------------------------------------|-------|----------------|-------------|-------|----------------|
|              | c-PARP                                     | p-JNK | c-Caspase<br>3 | c-PARP      | p-JNK | c-Caspase<br>3 |
| SNU719 0nM   | 0.07                                       | 0.08  | ND             | 1.00        | 1.00  | ND             |
| SNU719 5nM   | 0.31                                       | 0.13  | ND             | 4.63        | 1.57  | ND             |
| SNU719 10nM  | 0.63                                       | 0.23  | ND             | 9.40        | 2.84  | ND             |
| SNU719 100nM | 0.72                                       | 0.47  | ND             | 10.83       | 5.83  | ND             |
| MKN28 0nM    | 0.08                                       | 0.10  | ND             | 1.21        | 1.22  | ND             |
| MKN28 5nM    | 0.77                                       | 0.98  | 0.22           | 11.49       | 12.14 | 1.00           |
| MKN28 10nM   | 0.77                                       | 1.12  | 0.61           | 11.57       | 13.86 | 2.80           |
| MKN28 100nM  | 1.22                                       | 1.05  | 1.06           | 18.30       | 13.00 | 4.85           |

\* ND : Non-detectable

**Fig. 2d**

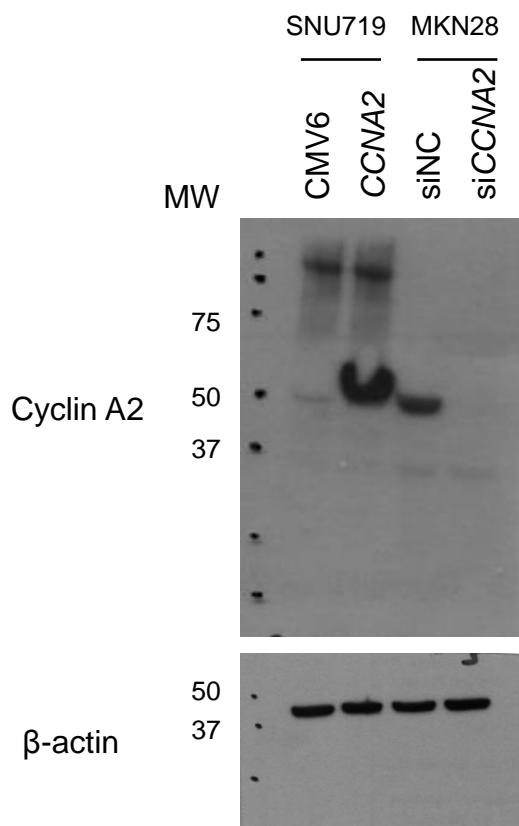

| Figure 2 (d)  | Normalized intensity (/ $\beta$ -actin) | Fold change |
|---------------|-----------------------------------------|-------------|
|               | Cyclin A2                               | Cyclin A2   |
| SNU719 CMV6   | 0.11                                    | 1.00        |
| SNU719 CCNA2  | 0.71                                    | 6.49        |
| MKN28 siNC    | 0.29                                    | 1.00        |
| MKN28 siCCNA2 | 0.02                                    | 0.06        |

**Fig. 2g**

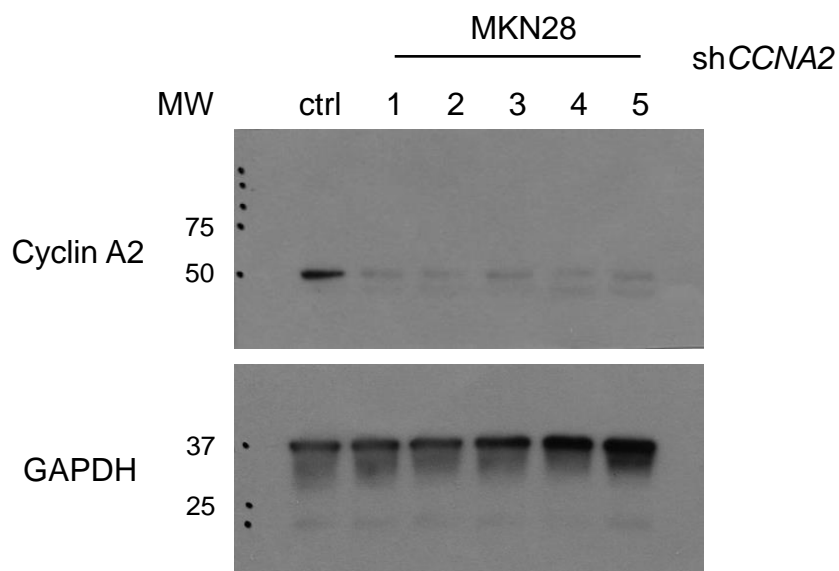

| Figure 2 (g) | Normalized intensity (/GAPDH) | Fold change |
|--------------|-------------------------------|-------------|
|              | Cyclin A2                     | Cyclin A2   |
| MKN28 CTRL   | 1.49                          | 1.00        |
| MKN28 #1     | 0.23                          | 0.16        |
| MKN28 #2     | 0.17                          | 0.11        |
| MKN28 #3     | 0.21                          | 0.14        |
| MKN28 #4     | 0.10                          | 0.07        |
| MKN28 #5     | 0.12                          | 0.08        |

**Fig. 3c**

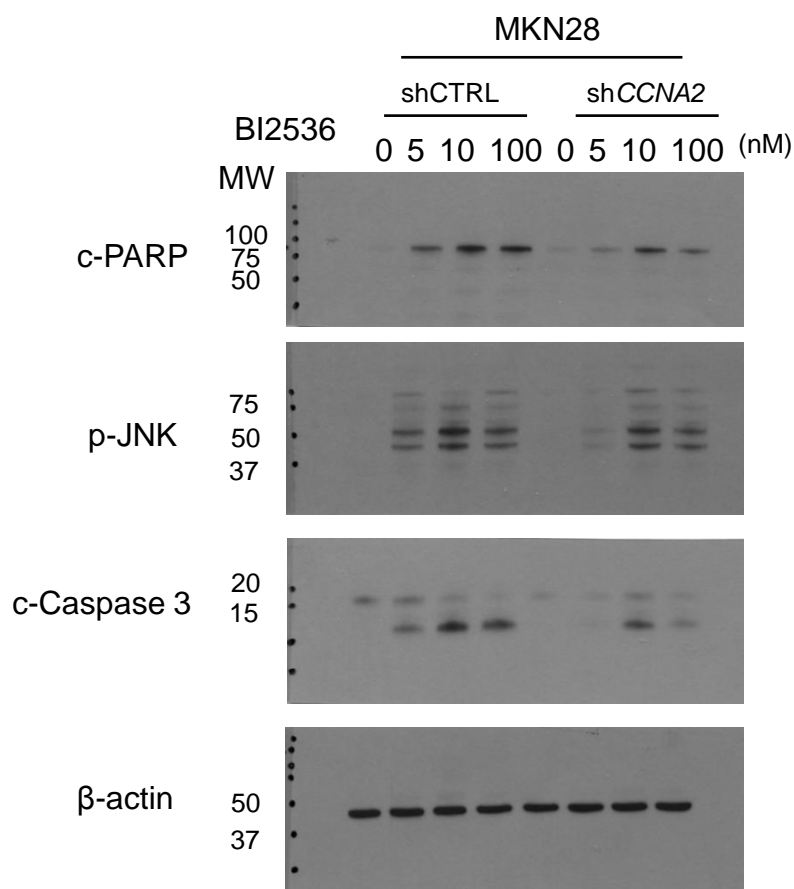

| Figure 3 (c)  | Normalized intensity<br>(/β-actin) |       |                | Fold change |       |                |
|---------------|------------------------------------|-------|----------------|-------------|-------|----------------|
|               | c-PARP                             | p-JNK | c-Caspase<br>3 | c-PARP      | p-JNK | c-Caspase<br>3 |
| shCTRL 0nM    | 0.06                               | 0.05  | 0.11           | 1.00        | 1.00  | 1.00           |
| shCTRL 5nM    | 0.48                               | 0.47  | 0.40           | 8.03        | 9.01  | 3.75           |
| shCTRL 10nM   | 0.85                               | 0.86  | 0.85           | 14.28       | 16.51 | 8.01           |
| shCTRL 100nM  | 0.87                               | 0.64  | 0.74           | 14.57       | 12.33 | 7.05           |
| shCCNA2 0nM   | 0.17                               | 0.16  | 0.09           | 2.90        | 2.98  | 0.87           |
| shCCNA2 5nM   | 0.26                               | 0.25  | 0.15           | 4.29        | 4.80  | 1.40           |
| shCCNA2 10nM  | 0.61                               | 0.72  | 0.56           | 10.28       | 13.91 | 5.32           |
| shCCNA2 100nM | 0.33                               | 0.53  | 0.28           | 5.46        | 10.11 | 2.62           |

**Fig. 4c**

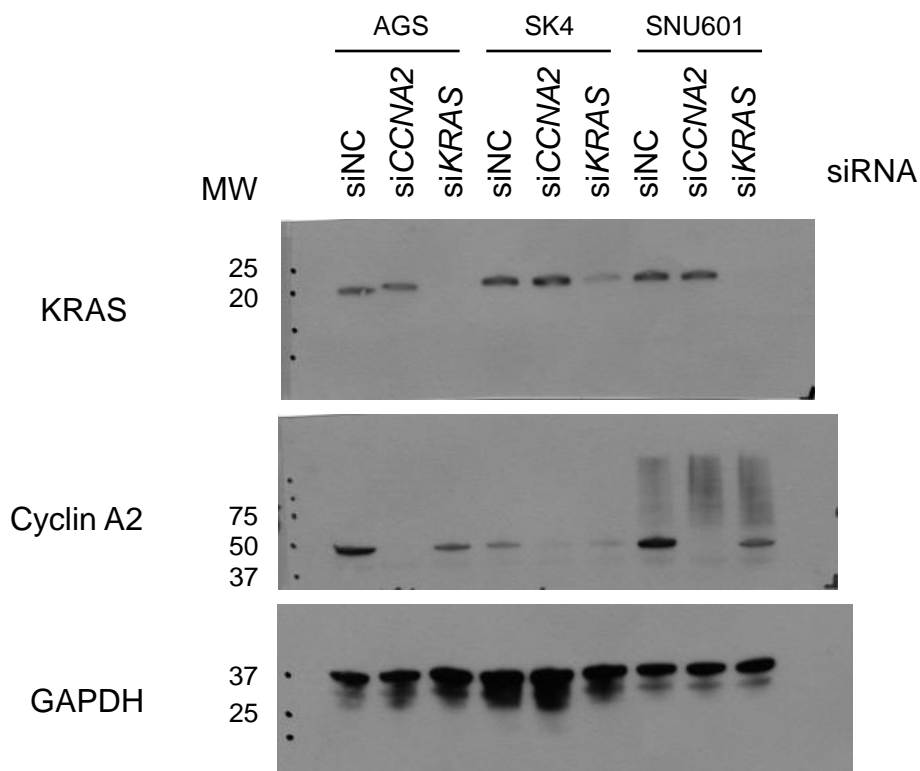

| Figure 4 (c)   | Normalized intensity (/GAPDH) |           | Fold change |           |
|----------------|-------------------------------|-----------|-------------|-----------|
|                | KRAS                          | Cyclin A2 | KRAS        | Cyclin A2 |
| AGS siNC       | 1.01                          | 1.38      | 1.00        | 1.00      |
| AGS siCCNA2    | 0.89                          | 0.10      | 0.87        | 0.07      |
| AGS siKRAS     | 0.10                          | 0.39      | 0.10        | 0.28      |
| SK4 siNC       | 0.71                          | 0.22      | 1.00        | 1.00      |
| SK4 siCCNA2    | 0.94                          | 0.07      | 1.32        | 0.33      |
| SK4 siKRAS     | 0.41                          | 0.16      | 0.58        | 0.72      |
| SNU601 siNC    | 1.24                          | 1.32      | 1.00        | 1.00      |
| SNU601 siCCNA2 | 1.05                          | 0.29      | 0.85        | 0.22      |
| SNU601 siKRAS  | 0.17                          | 0.74      | 0.14        | 0.56      |

**Fig. 4d**

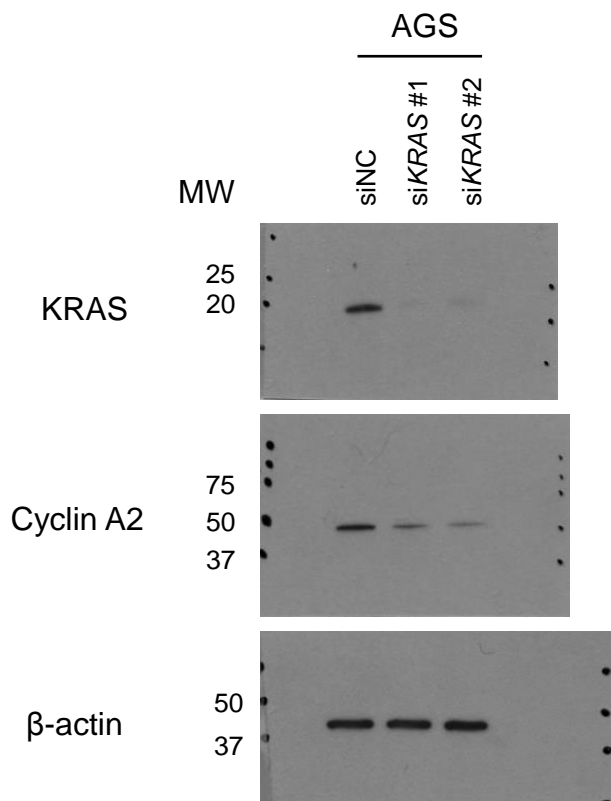

| Figure 4 (d)  | Normalized intensity<br>(/ $\beta$ -actin) |           | Fold change |           |
|---------------|--------------------------------------------|-----------|-------------|-----------|
|               | KRAS                                       | Cyclin A2 | KRAS        | Cyclin A2 |
| AGS siNC      | 0.98                                       | 0.95      | 1.00        | 1.00      |
| AGS siKRAS #1 | 0.16                                       | 0.48      | 0.16        | 0.50      |
| AGS siKRAS #2 | 0.24                                       | 0.24      | 0.25        | 0.25      |

**Fig. 4e**

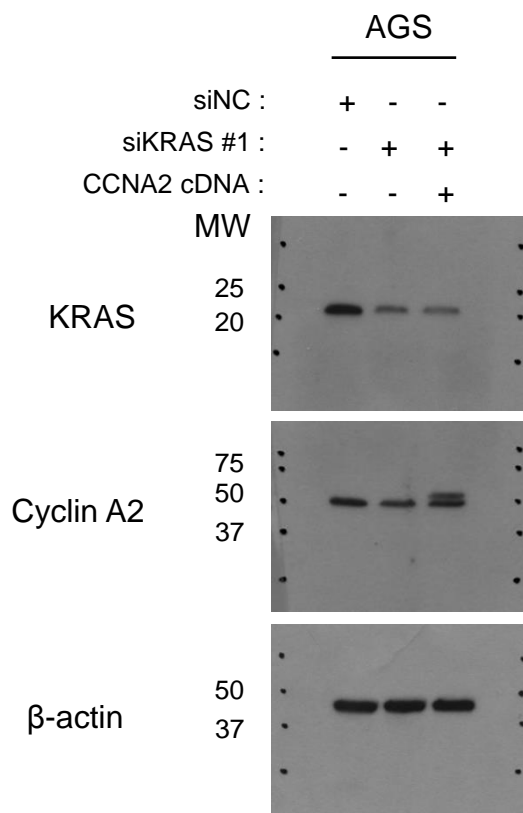

| Figure 4 (e)     | Normalized intensity<br>(/β-actin) |           | Fold change |           |
|------------------|------------------------------------|-----------|-------------|-----------|
|                  | KRAS                               | Cyclin A2 | KRAS        | Cyclin A2 |
| AGS siNC         | 1.07                               | 0.63      | 1.00        | 1.00      |
| AGS siKRAS       | 0.35                               | 0.54      | 0.33        | 0.85      |
| AGS siKRAS+CCNA2 | 0.33                               | 0.95      | 0.30        | 1.51      |



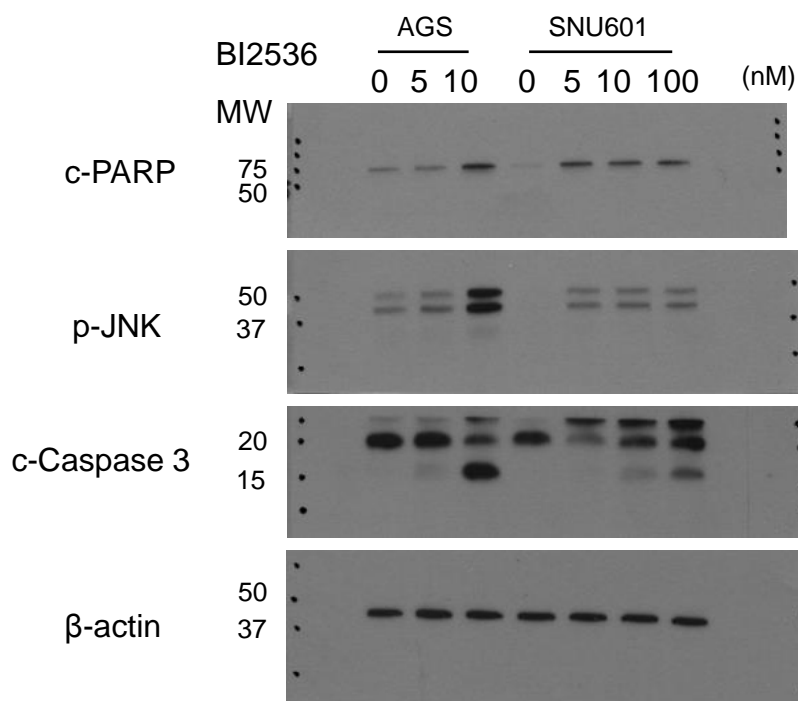

| Supplementary<br>Figure 2 (a) | Normalized intensity<br>(/ $\beta$ -actin) |       |                | Fold change |       |                |
|-------------------------------|--------------------------------------------|-------|----------------|-------------|-------|----------------|
|                               | c-PARP                                     | p-JNK | c-Caspase<br>3 | c-PARP      | p-JNK | c-Caspase<br>3 |
| AGS 0nM                       | 0.32                                       | 0.27  | 0.06           | 1.00        | 1.00  | 1.00           |
| AGS 5nM                       | 0.30                                       | 0.34  | 0.16           | 0.95        | 1.26  | 2.84           |
| AGS 10nM                      | 0.91                                       | 1.04  | 1.03           | 2.83        | 3.90  | 18.00          |
| SNU601 0nM                    | 0.12                                       | 0.05  | 0.07           | 0.37        | 0.20  | 1.25           |
| SNU601 5nM                    | 0.67                                       | 0.27  | 0.10           | 2.08        | 1.02  | 1.78           |
| SNU601 10nM                   | 0.64                                       | 0.32  | 0.31           | 1.99        | 1.19  | 5.38           |
| SNU601 100nM                  | 0.60                                       | 0.31  | 0.54           | 1.87        | 1.17  | 9.43           |

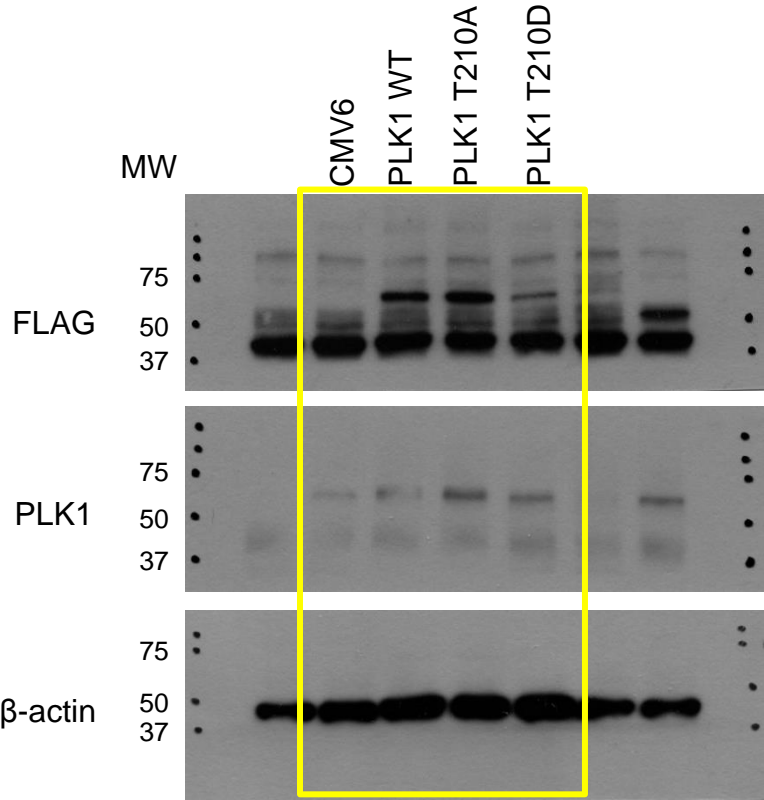

| Supplementary<br>Figure 4 (b) | Normalized intensity<br>(/ $\beta$ -actin) |      | Fold change |      |
|-------------------------------|--------------------------------------------|------|-------------|------|
|                               | FLAG                                       | PLK1 | FLAG        | PLK1 |
| CMV6                          | 0.08                                       | 0.34 | 1           | 1    |
| PLK1 WT                       | 0.90                                       | 0.44 | 10.84       | 1.29 |
| PLK1 T210A                    | 1.04                                       | 0.92 | 12.59       | 2.72 |
| PLK1 T210D                    | 0.40                                       | 0.54 | 4.84        | 1.60 |
